# Supplementary material for: Cross-Cultural Patterns in Dynamic Ratings of Positive and Negative Natural Emotional Behaviour
Source: PubMed Central journal article supplement (PMC3041750; doi:10.1371/journal.pone.0014679), 2011-02-18
Supplement: pone.0014679.s001.pdf [file pone.0014679.s001.pdf]

**Table S1.** Correlation matrices for fitted values of the generalized additive model terms and mean traces in clips 2, 5, 6, 8, 9, 10, 11 and 12. Correlations for generalized additive model terms are in the upper triangle while those for the means are in the lower triangle

|                | Guatemala | Peru     | Serbia   | N. Ireland |
|----------------|-----------|----------|----------|------------|
| <b>Clip 2</b>  |           |          |          |            |
| Guatemala      | —         | 0.93***  | 0.99***  | 0.99***    |
| Peru           | 0.91***   | —        | 0.90***  | 0.94***    |
| Serbia         | 0.98***   | 0.91***  | —        | 0.98***    |
| N. Ireland     | 0.99***   | 0.94***  | 0.98***  | —          |
| <b>Clip 5</b>  |           |          |          |            |
| Guatemala      | —         | 0.95***  | 0.99***  | 0.96***    |
| Peru           | 0.94***   | —        | 0.91***  | 0.98***    |
| Serbia         | 0.99***   | 0.91***  | —        | 0.92***    |
| N. Ireland     | 0.93***   | 0.97***  | 0.89***  | —          |
| <b>Clip 6</b>  |           |          |          |            |
| Guatemala      | —         | 0.24     | 0.73***  | 0.41**     |
| Peru           | 0.27      | —        | 0.80***  | 0.93***    |
| Serbia         | 0.60**    | 0.80***  | —        | 0.92***    |
| N. Ireland     | 0.48*     | 0.88***  | 0.96***  | —          |
| <b>Clip 8</b>  |           |          |          |            |
| Guatemala      | —         | -0.68*** | -0.84*** | -0.68***   |
| Peru           | -0.54***  | —        | 0.92***  | 0.97***    |
| Serbia         | -0.67***  | 0.87***  | —        | 0.90***    |
| N. Ireland     | -0.58***  | 0.91***  | 0.81***  | —          |
| <b>Clip 9</b>  |           |          |          |            |
| Guatemala      | —         | -0.54*** | 0.78***  | 0.96***    |
| Peru           | -0.44***  | —        | 0.00     | -0.52***   |
| Serbia         | 0.74***   | 0.09     | —        | 0.84***    |
| N. Ireland     | 0.90***   | -0.40**  | 0.84***  | —          |
| <b>Clip 10</b> |           |          |          |            |
| Guatemala      | —         | 0.96***  | 0.95***  | 0.96***    |
| Peru           | 0.96***   | —        | 0.99***  | 1.00***    |
| Serbia         | 0.93***   | 0.98***  | —        | 0.99***    |
| N. Ireland     | 0.95***   | 0.98***  | 0.98***  | —          |
| <b>Clip 11</b> |           |          |          |            |
| Guatemala      | —         | -0.12    | 0.43**   | 0.34*      |
| Peru           | -0.05     | —        | -0.19    | 0.84***    |
| Serbia         | 0.23      | -0.09    | —        | 0.23       |
| N. Ireland     | 0.44**    | 0.71***  | 0.40**   | —          |
| <b>Clip 12</b> |           |          |          |            |
| Guatemala      | —         | 0.77***  | 0.93***  | 0.88***    |
| Peru           | 0.87***   | —        | 0.65***  | 0.98***    |
| Serbia         | 0.91***   | 0.71***  | —        | 0.77***    |
| N. Ireland     | 0.93***   | 0.98***  | 0.80***  | —          |

Correlations for fitted values of the generalized additive model terms are in the upper triangle while those for the means traces are in the lower triangle. Significance codes: ‘\*’  $p < .05$ , ‘\*\*’  $p < .01$ , ‘\*\*\*’  $p < .001$
